# Supplementary material
Source: Springer Nature journal article supplement (https://www.springermedizin.de/resource/supplementary/13052_2010_141_MOESM1_ESM.pdf/9671476)

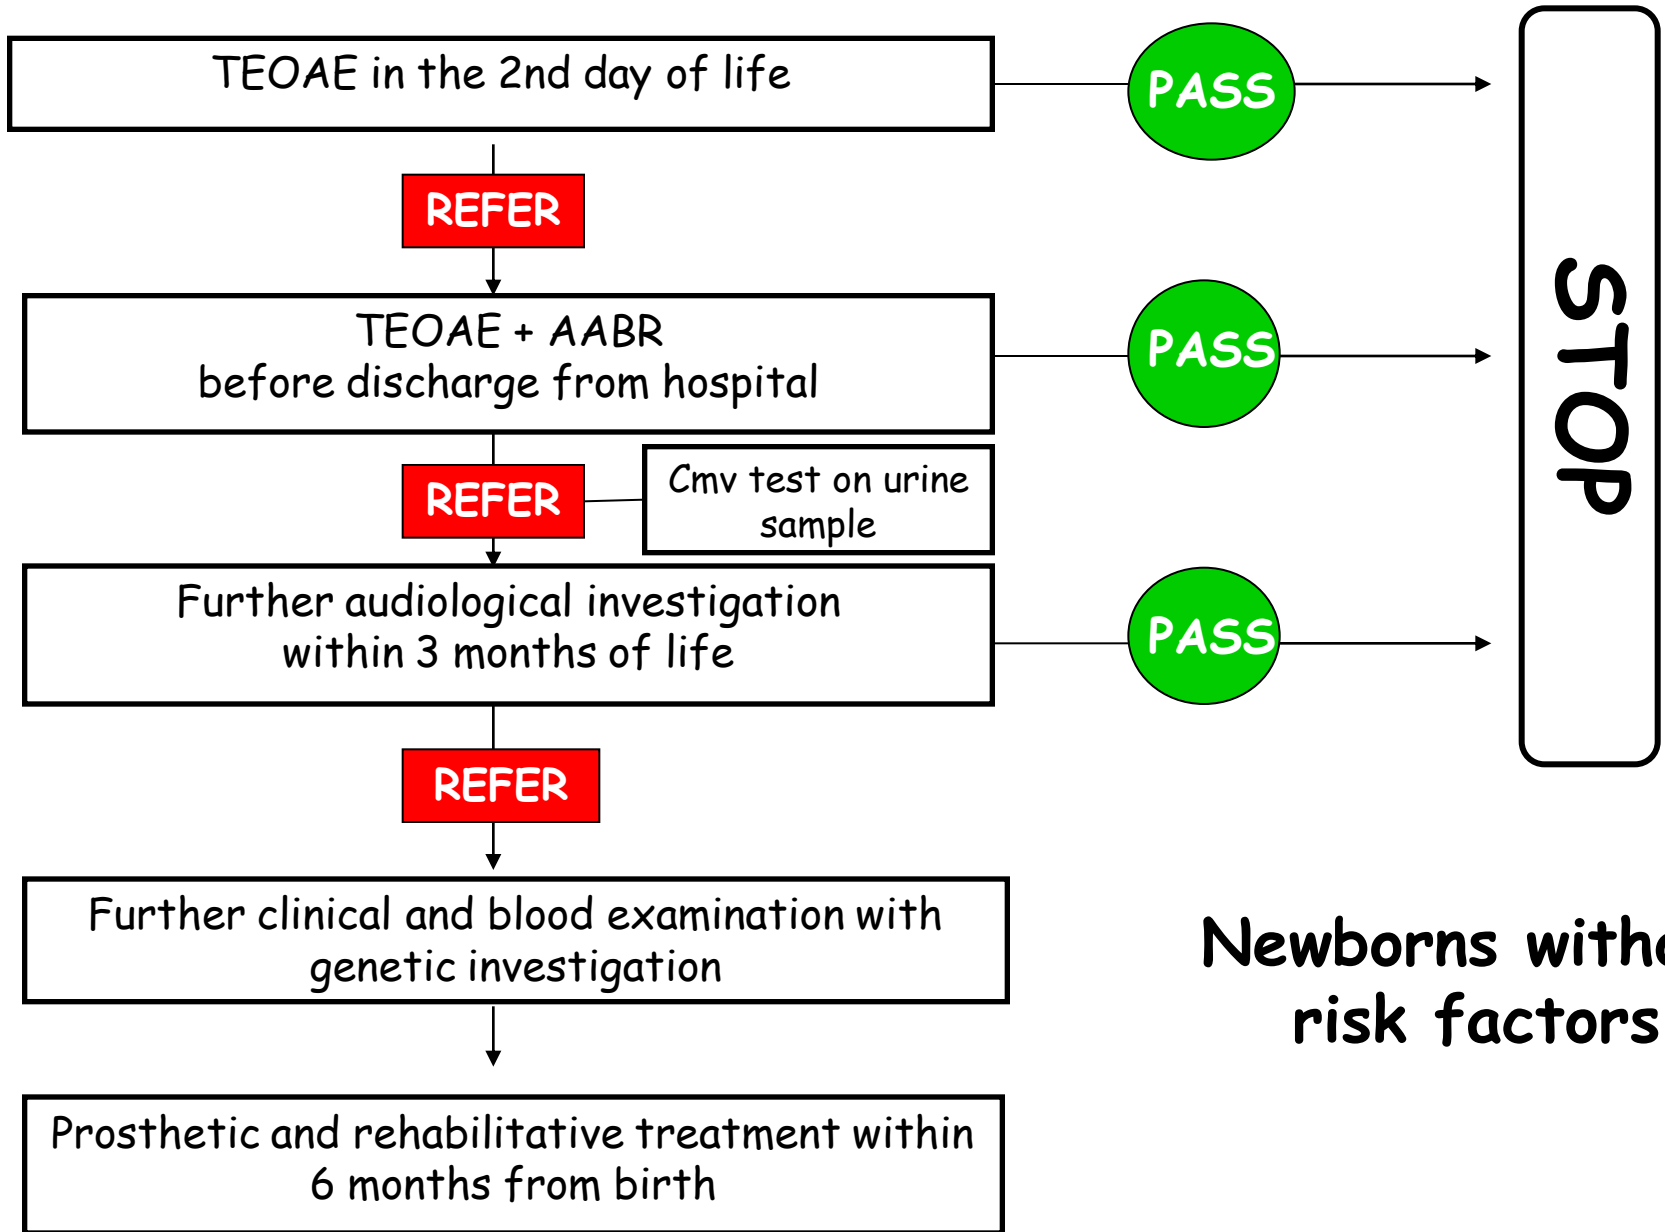

**Newborns without risk factors**

Supplement: MOESM1 [file 9671476]
